# Supplementary material for: Electrical stimulation promoting the angiogenesis in diabetic rat perforator flap through attenuating oxidative stress-mediated inflammation and apoptosis
Source: PeerJ. 2024 Jan 31;12:e16856. doi: 10.7717/peerj.16856 (PMC10838069; doi:10.7717/peerj.16856)
Supplement: Supplemental Information 1 [file peerj-12-16856-s001.xlsx]

## Sheet: Supplemental Table S1
Supplemental Table S1. The percentage of the skin flap survival area at different electrical stimulation time.
Electrical stimulation time (day)	Rat NO.	Flap survival area percentage (%)
0 day (cont)	1	87.5
0 day (cont)	2	80.1
0 day (cont)	3	79.5
0 day (cont)	4	81.3
0 day (cont)	5	81.2
0 day (cont)	6	73.9
0 day (cont)	7	78.5
3 days	8	100
3 days	9	84.7
3 days	10	89.2
3 days	11	73.4
3 days	12	76
3 days	13	92.6
3 days	14	95
5 days	15	79.2
5 days	16	100
5 days	17	80.9
5 days	18	86.9
5 days	19	90.6
5 days	20	87.1
5 days	21	92.4
7 days	22	92.4
7 days	23	95.3
7 days	24	89
7 days	25	100
7 days	26	100
7 days	27	89
7 days	28	92.2
Cont: Control

## Sheet: Supplemental Table S2
Supplemental Table S2. The percentage of the skin flap survival area in each group
Group	Rat NO.	Flap survival area percentage (%)
Control	30	80.1
Control	31	79.5
Control	32	84.2
Control	33	81.2
Control	34	78.2
Control	35	78.5
DM	36	71.8
DM	37	72.2
DM	39	74.6
DM	40	59.1
DM	41	76.3
DM	42	78.3
DMES	43	98.1
DMES	44	85.8
DMES	45	84.6
DMES	46	100
DMES	48	100
DMES	49	84.9
DM: Diabetes mellitus group, DMES: Diabetes mellitus electrical stimulation group.

## Sheet: Supplemental Table S3
Supplemental Table S3. Original data of the number of the vessels with diameter > 0.1mm in each rat.
Group	Rat No.	Number of the vessels with diameter > 0.1mm
Control	50	8
Control	51	13
Control	52	10
Control	53	13
DM	54	7
DM	55	6
DM	56	5
DM	57	7
DMES	58	31
DMES	59	18
DMES	60	17
DMES	61	20
DM: Diabetes mellitus group, DMES: Diabetes mellitus electrical stimulation group.

## Sheet: Supplemental Table S4
Supplemental Table S4. Original data of the microvessels density (MVD) in each rat.
Group	Rat NO.	Field 1: Microvessels number (N)	Field 2: Microvessels number (N)	Field 3: Microvessels number (N)	Field 4: Microvessels number (N)	Field 5: Microvessels number (N)	Mean Microvessels number (N)/Rat	Field area (0.85*0.48mm2)	MVD (N/mm2)
Control	50	34	37	32	33	36	34.4	0.408	84.3
Control	51	34	31	27	30	33	31	0.408	76
Control	52	38	40	36	30	32	35.2	0.408	86.3
Control	53	35	48	40	36	49	41.6	0.408	102
DM	54	26	32	30	30	26	28.8	0.408	70.6
DM	55	28	28	27	28	30	28.2	0.408	69.1
DM	56	27	25	28	26	31	27.4	0.408	67.2
DM	57	20	23	25	26	27	24.2	0.408	59.3
DMES	58	47	47	48	45	60	49.4	0.408	121.1
DMES	59	46	40	58	54	46	48.8	0.408	119.6
DMES	60	48	52	51	44	51	49.2	0.408	120.6
DMES	61	40	48	52	45	43	45.6	0.408	111.8
DM: Diabetes mellitus group, DMES: Diabetes mellitus electrical stimulation group, MVD: microvessels density, N: Number.

## Sheet: Supplemental Table S5
Supplemental Table S5. Original data of the reactive oxygen species (ROS) in each rat
Group	Rat No.	ROS florescence intensity 1	ROS florescence intensity 2	ROS mean florescence intensity	Protein concentration (ug/ul)	ROS intensity (ug/L)
Control	62	1053938	961851	1.00789e+06	2.62	0.38
Control	63	1238205	1196338	1.21727e+06	3.29	0.37
Control	64	1482279	1464531	1473405	3.91	0.38
DM	65	3212810	3254159	3.23348e+06	1.96	1.65
DM	66	2885737	2880351	2883044	1.71	1.68
DM	67	2594363	2850716	2.72254e+06	1.3	2.1
DMES	68	603398	624857	614128	1.57	0.39
DMES	69	996573	1110253	1053413	2.98	0.35
DMES	70	549487	568630	559058	1.78	0.31
DM: Diabetes mellitus group, DMES: Diabetes mellitus electrical stimulation group. ROS mean florescence intensity = (ROS florescence intensity 1+ ROS florescence intensity 2)/2 ROS intensity= ROS mean florescence intensity /protein concentration (ug/L)

## Sheet: Supplemental Table S6
Supplemental Table S6. Original data of the glutathione peroxidase (GSH) concentration in each rat.
	Group	Rat No.	405nm OD value	protein concentration (gprot/L)	GSH concentration (μmol/g protein)
Measurement OD value	Control	62	0.1077	2.9654	2.64
Measurement OD value	Control	63	0.1112	3.5563	2.8
Measurement OD value	Control	64	0.1035	2.0699	2.57
Measurement OD value	DM	65	0.1026	2.7165	1.75
Measurement OD value	DM	66	0.1026	3.0713	1.55
Measurement OD value	DM	67	0.0992	2.2575	1.2
Measurement OD value	DMES	68	0.1166	3.2534	4.06
Measurement OD value	DMES	69	0.106	2.0922	3.26
Measurement OD value	DMES	70	0.1044	1.8357	3.19
Standard OD value			0.161
Blank OD value			0.0947
DM: Diabetes mellitus group, DMES: Diabetes mellitus electrical stimulation group. GSH concentration (μmol/g protein) = [(Measurement OD value- Blank OD value)/(Standard OD value - Blank OD value)] × standard sample concentration (20μmol/L) × dilution fold (2 folds) ÷ protein concentration (gprot/L)

## Sheet: Supplemental Table S7
Supplemental Table S7. Original data of the interleukin-1β (IL-1β) gene expression level in each rat.
Group	Control	Control	Control	DM	DM	DM	DMES	DMES	DMES
Rat No.	62	63	64	65	66	67	68	69	70
IL-1β CT value	31.92	34.51	34.74	33.3	29.72	28.93	34.88	33.37	34.51
	Undetermined	34.1	32.95	32.37	Undetermined	32.48	32.26	30.05	29.63
	33.44	33.03	36.56	33.84	34.77	35.74	Undetermined	Undetermined	33.01
β-actin CT value	23.01	23.05	24.2	24.2	23.24	23.64	24.62	22.15	24.33
	22.98	23.17	24.1	24.13	23.17	23.68	24.47	22.25	24.4
	23.14	23.13	24.16	24.26	23.09	23.59	24.67	22.39	24.37
Gene expression level	1.24	0.57	1.19	1.96	1.83	2.3	0.79	0.45	1.46
DM: Diabetes mellitus group, DMES: Diabetes mellitus electrical stimulation group. Gene expression level = [2^-(IL-1β average CT value - β-actin average CT value)] ÷ Average [2^-(IL-1β average CT value - β-actin average CT value)] in control
