# Supplementary material for: Electrical stimulation promoting the angiogenesis in diabetic rat perforator flap through attenuating oxidative stress-mediated inflammation and apoptosis
Source: PeerJ journal article supplement (doi:10.7717/peerj.16856), 2024-01-31
Supplement: SupplementalFigures.pdf [file SupplementalFigures.pdf]

## **Supplemental Figure S1-S3: original western blotting band**

### **Electrical stimulation promoting the angiogenesis in diabetic rat perforator flap through attenuating oxidative stress-mediated inflammation and apoptosis**

**Authors:** Cong Chen<sup>1</sup>, Xiaolu Li<sup>1</sup>, Yong Hu<sup>1</sup>, Yuan Chen<sup>2</sup>, Hongrui Wang<sup>1</sup>, Xian Li<sup>1✉</sup>, Xiucun Li<sup>1✉</sup>

1 Department of Hand and Foot Surgery, The Second Hospital of Shandong University, No.247, Beiyuan Street, Jinan, Shandong, 250033, China.

2 Institute of Medical Sciences, The Second Hospital of Shandong University, No.247, Beiyuan Street, Jinan, Shandong, 250033, China.

✉: These two authors contributed equally to this work, co-corresponding authors.

**Corresponding Authors:** Xian Li<sup>1✉</sup>, Xiucun Li<sup>1✉</sup>

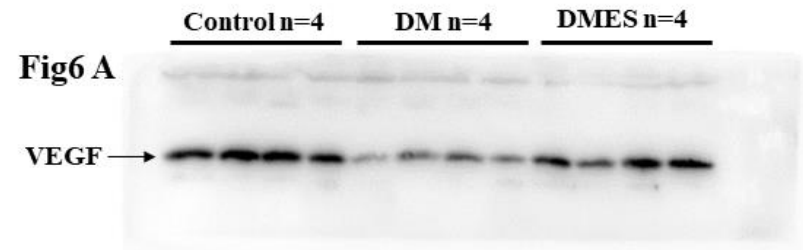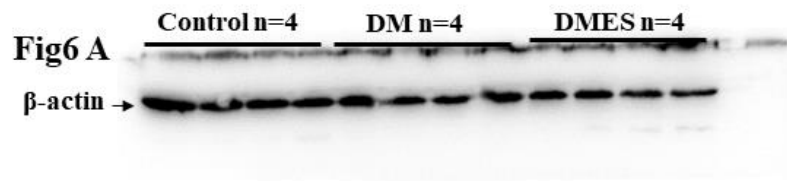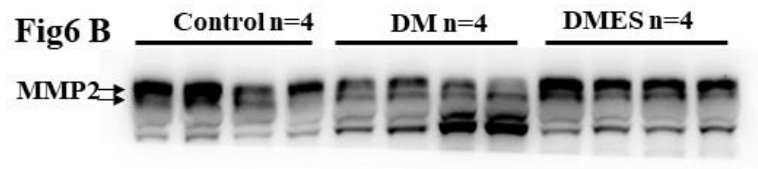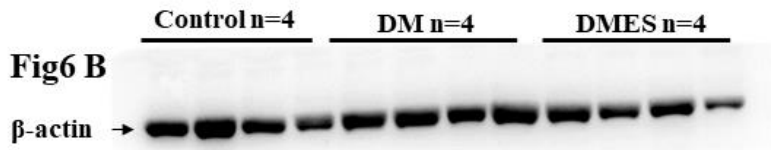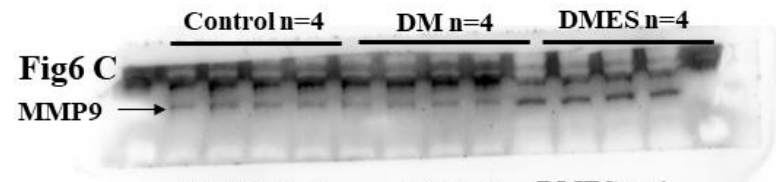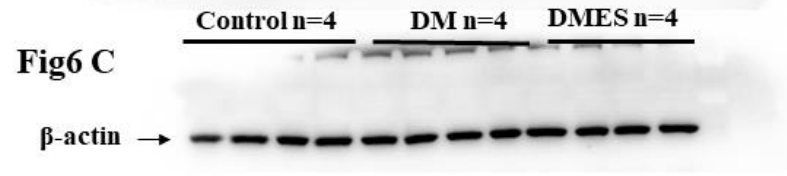

**Supplemental Figure S1.** The original western blotting images of the Figure 6 (Western blotting showing the expression and quantification of the optical density of VEGF (A), MMP2 (B), MMP9 (C) in the control, DM and DMES group).

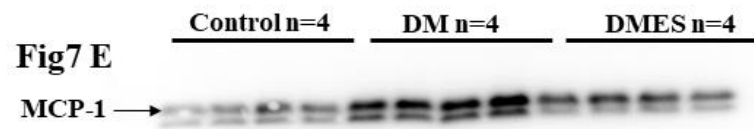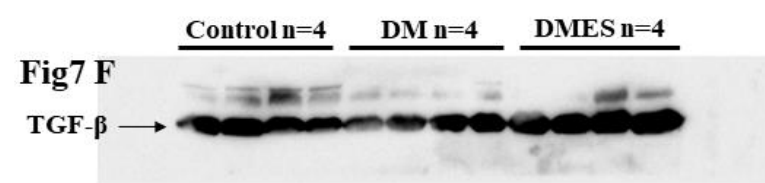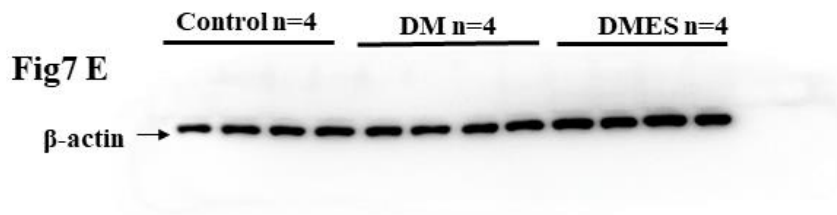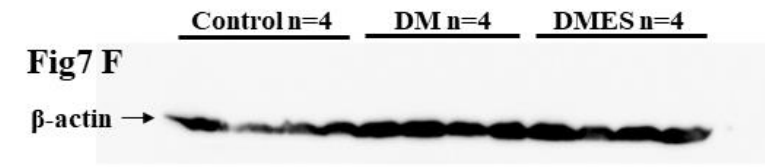

**Supplemental Figure S2.** The original western blotting images of the Figure 7E and F.

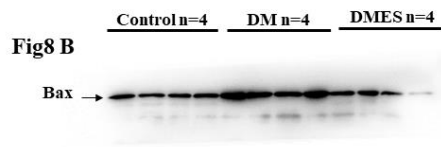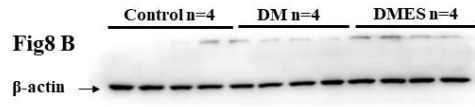

**Supplemental Figure S3.** The original western blotting images of the Figure 8B.
